# Supplementary material
Source: PubMed Central journal article supplement (PMC8780008)
Supplement: NIHMS1769818-supplement-Supplemental_Figures.pdf [file NIHMS1769818-supplement-Supplemental_Figures.pdf]

## Supporting information (Figures)

# Large-scale Modeling of Multi-Species Acute Toxicity Endpoints using Consensus of Multi-Task Deep Learning Methods

Sankalp Jain<sup>a</sup>, Vishal B. Siramshetty<sup>a</sup>, Vinicius M. Alves<sup>b</sup>, Eugene N. Muratov<sup>b</sup>, Nicole Kleinstreuer<sup>c,d</sup>, Alexander Tropsha<sup>b</sup>, Marc C. Nicklaus<sup>e</sup>, Anton Simeonov<sup>a</sup>, Alexey V. Zakharov<sup>a,\*</sup>

<sup>a</sup> National Center for Advancing Translational Sciences (NCATS), National Institutes of Health, 9800 Medical Center Drive, Rockville, MD, 20850, United States

<sup>b</sup> UNC Eshelman School of Pharmacy, University of North Carolina at Chapel Hill, Chapel Hill, North Carolina 27599, United States

<sup>c</sup> Division of Intramural Research, Biostatistics and Computational Biology Branch, National Institute of Environmental Health Sciences, 111 T.W. Alexander Drive, Durham, North Carolina 27709, United States

<sup>d</sup> National Toxicology Program Interagency Center for the Evaluation of Alternative Toxicological Methods, National Institute of Environmental Health Sciences, 111 T.W. Alexander Drive, Durham, North Carolina 27709, United States

° Computer-Aided Drug Design (CADD) Group, Chemical Biology Laboratory, Center for Cancer Research, National Cancer Institute, National Institutes of Health, DHHS, NCI-Frederick, 376 Boyles St., Frederick, MD 21702, United States

\*Corresponding author

Alexey V. Zakharov

Email: [alexey.zakharov@nih.gov](mailto:alexey.zakharov@nih.gov)

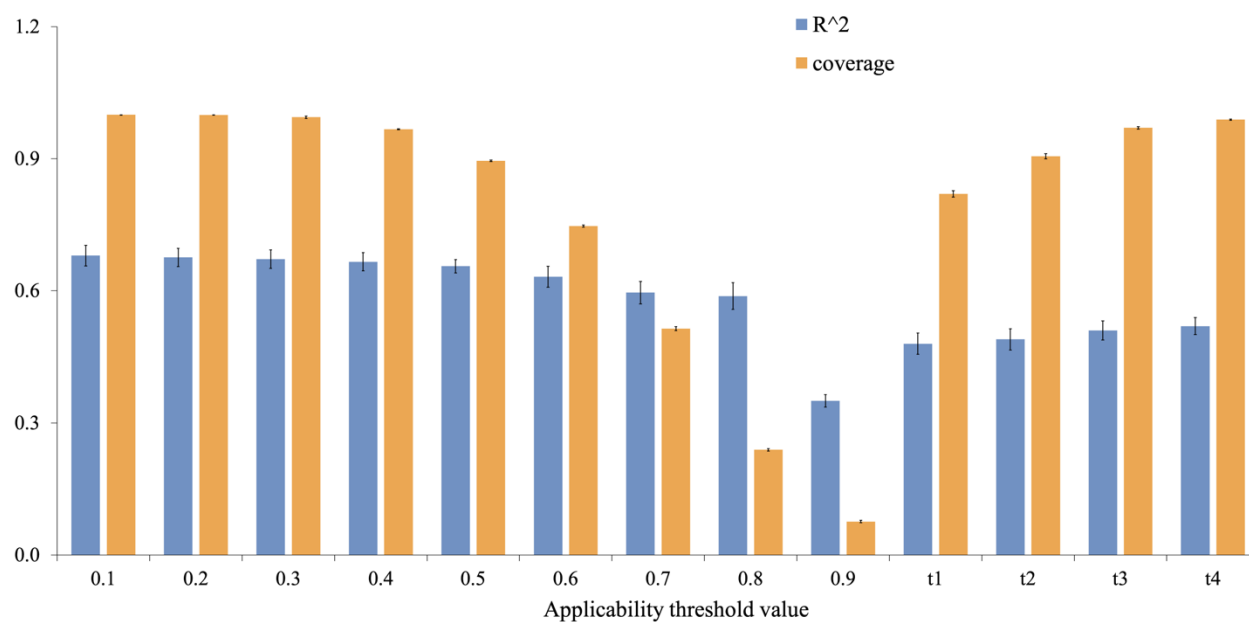

**Figure S1:** Distribution of the DLCA prediction results ( $R^2$ ) over AD cut-offs and coverage values. The error bar represents the standard deviation of the average performance over five-folds.

(a)

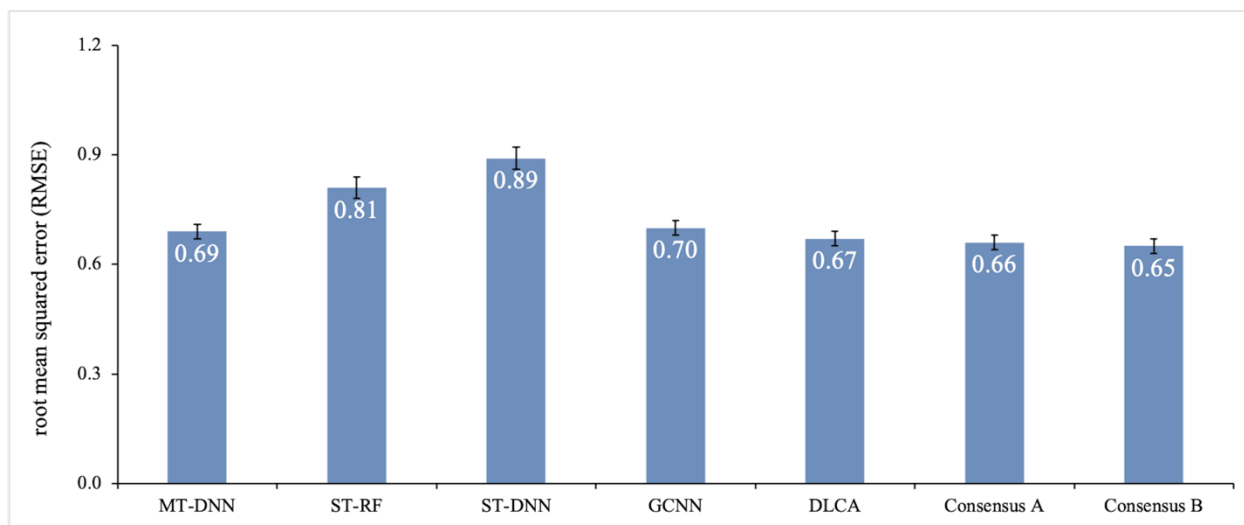

(b)

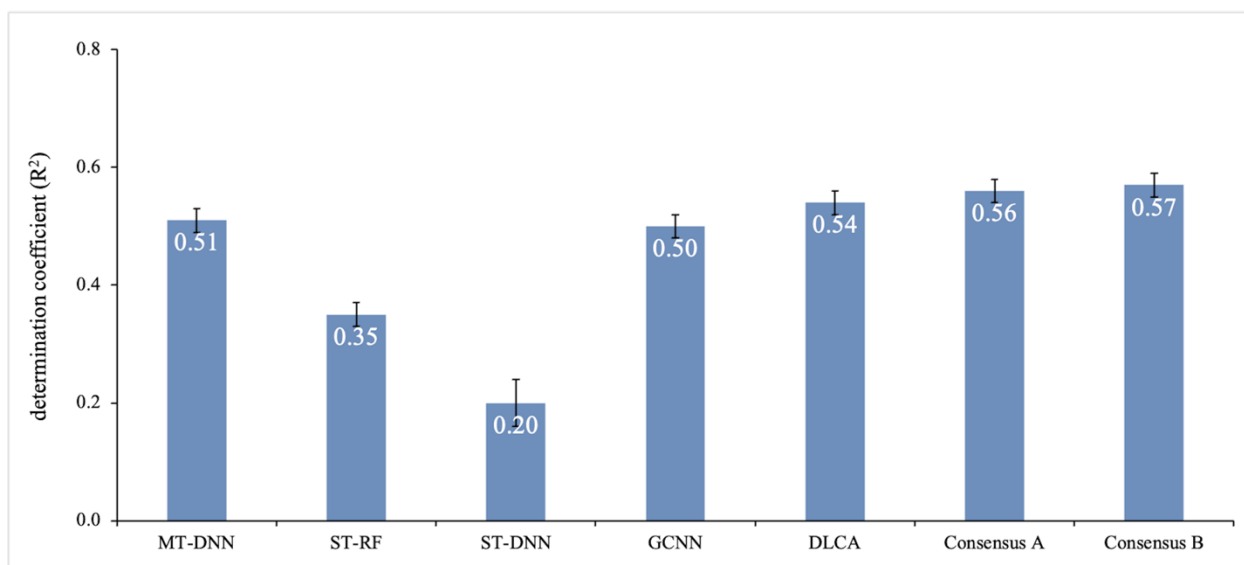

**Figure S2.** Average performance (a) RMSE, (b)  $R^2$  of all 59 endpoints for each approach over five-fold cross-validation based on training and test data generated using random splitting. The error bar represents the standard error mean of the average performance over five-folds.
