# Supplementary material
Source: PubMed Central journal article supplement (PMC8780008)
Supplement: NIHMS1769818-supplement-Supplemental_Tables.pdf [file NIHMS1769818-supplement-Supplemental_Tables.pdf]

## Supporting information (tables) to

### Large-scale Modeling of Multi-Species Acute Toxicity Endpoints using Conse

Sankalp Jain, Vishal B. Siramshetty, Vinicius M. Alves, Eugene N. Muratov, N

\*Corresponding author: Alexey V. Zakharov (Email: alexey.zakharov@nih.gov)

| Species                      | Route of administration | Toxicity type     |
|------------------------------|-------------------------|-------------------|
| mouse                        | intraperitoneal         | lethal dose fifty |
| mouse                        | oral                    | lethal dose fifty |
| mouse                        | intravenous             | lethal dose fifty |
| rat                          | oral                    | lethal dose fifty |
| mouse                        | subcutaneous            | lethal dose fifty |
| rat                          | intraperitoneal         | lethal dose fifty |
| rat                          | intravenous             | lethal dose fifty |
| rat                          | subcutaneous            | lethal dose fifty |
| mouse                        | unreported              | lethal dose fifty |
| rabbit                       | skin                    | lethal dose fifty |
| mammal (species unspecified) | unreported              | lethal dose fifty |
| rabbit                       | oral                    | lethal dose fifty |
| rat                          | skin                    | lethal dose fifty |
| rat                          | unreported              | lethal dose fifty |
| guinea pig                   | oral                    | lethal dose fifty |
| rabbit                       | intravenous             | lethal dose fifty |
| rat                          | oral                    | lethal dose low   |
| rat                          | intraperitoneal         | lethal dose low   |
| mouse                        | intraperitoneal         | lethal dose low   |
| mouse                        | oral                    | lethal dose low   |
| mouse                        | subcutaneous            | lethal dose low   |
| man                          | oral                    | toxic dose low    |
| women                        | oral                    | toxic dose low    |
| mammal (species unspecified) | oral                    | lethal dose fifty |
| dog                          | oral                    | lethal dose fifty |
| mouse                        | intramuscular           | lethal dose fifty |
| mammal (species unspecified) | intraperitoneal         | lethal dose fifty |
| dog                          | intravenous             | lethal dose fifty |
| dog                          | intravenous             | lethal dose low   |
| chicken                      | oral                    | lethal dose fifty |
| quail                        | oral                    | lethal dose fifty |
| rabbit                       | intravenous             | lethal dose low   |
| bird - wild                  | oral                    | lethal dose fifty |
| mouse                        | parenteral              | lethal dose fifty |
| rat                          | intramuscular           | lethal dose fifty |
| cat                          | intravenous             | lethal dose fifty |
| rabbit                       | oral                    | lethal dose low   |
| guinea pig                   | intraperitoneal         | lethal dose fifty |
| rabbit                       | subcutaneous            | lethal dose low   |

|                              |                 |                   |
|------------------------------|-----------------|-------------------|
| mouse                        | skin            | lethal dose fifty |
| duck                         | oral            | lethal dose fifty |
| dog                          | oral            | lethal dose low   |
| rabbit                       | skin            | lethal dose low   |
| guinea pig                   | subcutaneous    | lethal dose low   |
| guinea pig                   | skin            | lethal dose fifty |
| rat                          | subcutaneous    | lethal dose low   |
| cat                          | oral            | lethal dose fifty |
| guinea pig                   | subcutaneous    | lethal dose fifty |
| cat                          | intravenous     | lethal dose low   |
| rabbit                       | subcutaneous    | lethal dose fifty |
| guinea pig                   | intravenous     | lethal dose fifty |
| cat                          | oral            | lethal dose low   |
| human                        | oral            | toxic dose low    |
| rat                          | intravenous     | lethal dose low   |
| rabbit                       | intraperitoneal | lethal dose fifty |
| mammal (species unspecified) | subcutaneous    | lethal dose fifty |
| guinea pig                   | intravenous     | lethal dose low   |
| frog                         | subcutaneous    | lethal dose low   |
| mouse                        | intravenous     | lethal dose low   |
| mouse                        | intraperitoneal | toxic dose low    |
| mouse                        | oral            | toxic dose low    |
| rat                          | intraperitoneal | toxic dose low    |
| rat                          | intravenous     | toxic dose low    |
| rat                          | oral            | toxic dose low    |
| rat                          | subcutaneous    | toxic dose low    |

**Analysis of Multi-Task Deep Learning Methods**

Michelle Kleinstreuer, Alexander Tropsha, Marc C. Nicklaus, Anton Simeonov, Alexey V. Zakharov\*)

| Number of measurements (threshold 100) | Number of measurements in Sost Group | Group |
|----------------------------------------|--------------------------------------|-------|
| 36295                                  | 37202                                | a     |
| 23373                                  | 24355                                | a     |
| 16978                                  | 17742                                | a     |
| 10190                                  | 10743                                | a     |
| 6769                                   | 7221                                 | a     |
| 5021                                   | 5041                                 | a     |
| 2472                                   | 2538                                 | a     |
| 1896                                   | 2014                                 | a     |
| 1739                                   | 1804                                 | a     |
| 1495                                   | 1734                                 | a     |
| 1129                                   | 1121                                 | a     |
| 894                                    | 910                                  | a     |
| 835                                    | 930                                  | a     |
| 806                                    | 838                                  | a     |
| 793                                    | 799                                  | a     |
| 792                                    | 764                                  | a     |
| 322                                    | 966                                  | a     |
| 318                                    | 1029                                 | a     |
| 266                                    | 2965                                 | b     |
| 264                                    | 1565                                 | b     |
| 252                                    | 921                                  | b     |
| 163                                    | 512                                  | b     |
| 156                                    | 490                                  | b     |
| 674                                    | 0                                    | c     |
| 649                                    | 0                                    | c     |
| 571                                    | 0                                    | c     |
| 545                                    | 0                                    | c     |
| 468                                    | 0                                    | c     |
| 360                                    | 0                                    | c     |
| 353                                    | 0                                    | c     |
| 352                                    | 0                                    | c     |
| 346                                    | 0                                    | c     |
| 338                                    | 0                                    | c     |
| 302                                    | 0                                    | c     |
| 300                                    | 0                                    | c     |
| 261                                    | 0                                    | c     |
| 249                                    | 0                                    | c     |
| 248                                    | 0                                    | c     |
| 241                                    | 0                                    | c     |

|     |      |   |
|-----|------|---|
| 214 | 0    | c |
| 192 | 0    | c |
| 187 | 0    | c |
| 181 | 0    | c |
| 179 | 0    | c |
| 176 | 0    | c |
| 174 | 0    | c |
| 171 | 0    | c |
| 169 | 0    | c |
| 159 | 0    | c |
| 156 | 0    | c |
| 153 | 0    | c |
| 142 | 0    | c |
| 140 | 0    | c |
| 135 | 0    | c |
| 131 | 0    | c |
| 125 | 0    | c |
| 121 | 0    | c |
| 112 | 0    | c |
| 102 | 0    | c |
| 0   | 1057 | d |
| 0   | 646  | d |
| 0   | 1117 | d |
| 0   | 608  | d |
| 0   | 955  | d |
| 0   | 555  | d |

a

b

c

d

a+b+c



endpoints compared with Sosnin et al. [49] (number of measurements > 300)

endpoint included in our study but not included in the comparison with Sosnin et al. [49] (as number of measurements > 300)

endpoint included in our study but not included in the study by Sosnin et al. [49]

endpoint not included in our study but included in the study by Sosnin et al. [49]

endpoints used for multi-task modeling in this study





**Supporting information (tables) to**

**Large-scale Modeling of Multi-Species Acute Toxicity Endpoints using Consensus of Multi-Task**

Sankalp Jain, Vishal B. Siramshetty, Vinicius M. Alves, Eugene N. Muratov, Nicole Kleinstreuer, ,

\*Corresponding author: Alexey V. Zakharov (Email: alexey.zakharov@nih.gov)

| <b>Model architectures for MT-DNN</b> | <b>Parameter</b>                 |
|---------------------------------------|----------------------------------|
|                                       | number of hidden layers          |
|                                       | number of neurons for each layer |
|                                       | optimizer                        |
|                                       | learning rate                    |
|                                       | activation function              |
|                                       | batch size                       |
|                                       | number of epochs                 |

| <b>Model architectures for ST-DNN</b> | <b>Parameter</b>                 |
|---------------------------------------|----------------------------------|
|                                       | number of hidden layers          |
|                                       | number of neurons for each layer |
|                                       |                                  |
|                                       | optimizer                        |
|                                       | learning rate                    |
|                                       | activation function              |
|                                       | batch size                       |
|                                       | number of epochs                 |

| <b>Parameters for Hyperparameter optimization for MT-DNN</b> |                       |
|--------------------------------------------------------------|-----------------------|
| <b>Fixed parameters</b>                                      |                       |
|                                                              | <b>Parameter</b>      |
|                                                              | activation function   |
|                                                              | optimizer             |
| <b>Tuned Parameters</b>                                      |                       |
|                                                              | <b>Parameter</b>      |
|                                                              | dense_size_candidates |
|                                                              | learning rate (Adam)  |
|                                                              | number of epochs      |
|                                                              | batch size            |
|                                                              |                       |
| <b>Parameters for Hyperparameter optimization for ST-DNN</b> |                       |
| <b>Fixed parameters</b>                                      |                       |
|                                                              | <b>Parameter</b>      |
|                                                              | activation function   |
|                                                              | optimizer             |
| <b>Tuned Parameters</b>                                      | number of epochs      |
|                                                              | batch size            |
|                                                              | <b>Parameter</b>      |
|                                                              | learning rate (Adam)  |

| Model architectures for DLCA                           | Parameter                        |
|--------------------------------------------------------|----------------------------------|
|                                                        |                                  |
| <b>Descriptor 1-3 (Fingerprints)</b>                   | number of hidden layers          |
|                                                        | number of neurons for each layer |
|                                                        |                                  |
| <b>Descriptor 4 (RDKit physicochemical properties)</b> | number of hidden layers          |
|                                                        | number of neurons for each layer |
|                                                        | Dropout                          |
|                                                        |                                  |
| <b>Descriptor 5 (SMILES)</b>                           | architecture                     |
|                                                        | Pooling                          |
|                                                        | number of hidden layers          |
|                                                        | number of neurons for each layer |
|                                                        | optimizer                        |
|                                                        | learning rate                    |
|                                                        |                                  |
|                                                        | activation function              |
|                                                        | batch size                       |
|                                                        | number of epochs                 |

| Optimized hyperparameter parameter for GCNN v2 |                  |
|------------------------------------------------|------------------|
| <b>Random Split</b>                            |                  |
|                                                | <b>Parameter</b> |
|                                                | depth            |
|                                                | dropout          |
|                                                | ffn_num_layers   |
|                                                | hidden_size      |
| <b>Scaffold Split</b>                          |                  |
|                                                | <b>Parameter</b> |
|                                                | depth            |
|                                                | dropout          |
|                                                | ffn_num_layers   |
|                                                | hidden_size      |

## Deep Learning Methods

Alexander Tropsha, Marc C. Nicklaus, Anton Simeonov, Alexey V. Zakharov\*

|                |
|----------------|
| <b>Value</b>   |
| 3              |
| 2000, 700, 500 |
| Adam           |
| 0.0001         |
| relu           |
| 32             |
| 20             |

|                                 |
|---------------------------------|
| <b>Value</b>                    |
| 3                               |
| 500, 300, 100 (train_size<=700) |
| 2000, 700, 500 (train_size>700) |
| Adam                            |
| 0.0001                          |
| relu                            |
| 32                              |
| 20                              |

|                                          |                     |
|------------------------------------------|---------------------|
|                                          |                     |
|                                          |                     |
| <b>Value</b>                             |                     |
| ReLu                                     |                     |
| Adam                                     |                     |
|                                          |                     |
| <b>Values</b>                            | <b>Best Value</b>   |
| [2000, 700, 500, 1], [1500, 500, 100, 1] | [1500, 500, 100, 1] |
| 0.01, 0.001, 0.0001, 0.00001             | 0.0001              |
| 20, 50                                   | 50                  |
| 128, 256, 512, 1024                      | 128                 |
|                                          |                     |
|                                          |                     |
|                                          |                     |
| <b>Value</b>                             |                     |
| ReLu                                     |                     |
| Adam                                     |                     |
|                                          | 20                  |
|                                          | 32                  |
| <b>Values</b>                            |                     |
| 0.01, 0.001, 0.0001, 0.00001             |                     |

|                       |
|-----------------------|
| <b>Value</b>          |
|                       |
| 4                     |
| 8000, 2000, 1000, 700 |
|                       |
| 4                     |
| 8000, 2000, 1000, 700 |
| 0.3                   |
|                       |
| 1D convolutional      |
| GlobalMaxPooling1D    |
| 1                     |
| 200                   |
| Adagrad               |
| 0.01                  |
|                       |
| relu                  |
| 128                   |
| 20                    |

|              |
|--------------|
|              |
|              |
| <b>Value</b> |
| 5            |
| 0.3          |
| 3            |
| 1700         |
|              |
| <b>Value</b> |
| 5            |
| 0.15         |
| 3            |
| 2200         |

## Supporting information (tables) to

### Large-scale Modeling of Multi-Species Acute Toxicity Endpoints using Consensus of Multi-

Sankalp Jain, Vishal B. Siramshetty, Vinicius M. Alves, Eugene N. Muratov, Nicole Kleinstr

\*Corresponding author: Alexey V. Zakharov (Email: alexey.zakharov@nih.gov)

| Species     | Route of administration | Toxicity type     |
|-------------|-------------------------|-------------------|
| mouse       | intraperitoneal         | lethal dose fifty |
| mouse       | oral                    | lethal dose fifty |
| mouse       | intravenous             | lethal dose fifty |
| rat         | oral                    | lethal dose fifty |
| mouse       | subcutaneous            | lethal dose fifty |
| rat         | intraperitoneal         | lethal dose fifty |
| rat         | intravenous             | lethal dose fifty |
| rat         | subcutaneous            | lethal dose fifty |
| mouse       | unreported              | lethal dose fifty |
| rabbit      | skin                    | lethal dose fifty |
| mammal (sp  | unreported              | lethal dose fifty |
| rabbit      | oral                    | lethal dose fifty |
| rat         | skin                    | lethal dose fifty |
| rat         | unreported              | lethal dose fifty |
| guinea pig  | oral                    | lethal dose fifty |
| rabbit      | intravenous             | lethal dose fifty |
| rat         | oral                    | lethal dose low   |
| rat         | intraperitoneal         | lethal dose low   |
| mouse       | intraperitoneal         | lethal dose low   |
| mouse       | oral                    | lethal dose low   |
| mouse       | subcutaneous            | lethal dose low   |
| man         | oral                    | toxic dose low    |
| women       | oral                    | toxic dose low    |
| mammal (sp  | oral                    | lethal dose fifty |
| dog         | oral                    | lethal dose fifty |
| mouse       | intramuscular           | lethal dose fifty |
| mammal (sp  | intraperitoneal         | lethal dose fifty |
| dog         | intravenous             | lethal dose fifty |
| dog         | intravenous             | lethal dose low   |
| chicken     | oral                    | lethal dose fifty |
| quail       | oral                    | lethal dose fifty |
| rabbit      | intravenous             | lethal dose low   |
| bird - wild | oral                    | lethal dose fifty |
| mouse       | parenteral              | lethal dose fifty |
| rat         | intramuscular           | lethal dose fifty |
| cat         | intravenous             | lethal dose fifty |
| rabbit      | oral                    | lethal dose low   |
| guinea pig  | intraperitoneal         | lethal dose fifty |
| rabbit      | subcutaneous            | lethal dose low   |

|            |                 |                   |
|------------|-----------------|-------------------|
| mouse      | skin            | lethal dose fifty |
| duck       | oral            | lethal dose fifty |
| dog        | oral            | lethal dose low   |
| rabbit     | skin            | lethal dose low   |
| guinea pig | subcutaneous    | lethal dose low   |
| guinea pig | skin            | lethal dose fifty |
| rat        | subcutaneous    | lethal dose low   |
| cat        | oral            | lethal dose fifty |
| guinea pig | subcutaneous    | lethal dose fifty |
| cat        | intravenous     | lethal dose low   |
| rabbit     | subcutaneous    | lethal dose fifty |
| guinea pig | intravenous     | lethal dose fifty |
| cat        | oral            | lethal dose low   |
| human      | oral            | toxic dose low    |
| rat        | intravenous     | lethal dose low   |
| rabbit     | intraperitoneal | lethal dose fifty |
| mammal (sp | subcutaneous    | lethal dose fifty |
| guinea pig | intravenous     | lethal dose low   |
| frog       | subcutaneous    | lethal dose low   |
| mouse      | intravenous     | lethal dose low   |

## Task Deep Learning Methods

auer, Alexander Tropsha, Marc C. Nicklaus, Anton Simeonov, Alexey V. Zakharov\*

| Number of measurements | % of available measurements | % of missing measurements |
|------------------------|-----------------------------|---------------------------|
| 36295                  | 45.32                       | 54.68                     |
| 23373                  | 29.19                       | 70.81                     |
| 16978                  | 21.20                       | 78.80                     |
| 10190                  | 12.72                       | 87.28                     |
| 6769                   | 8.45                        | 91.55                     |
| 5021                   | 6.27                        | 93.73                     |
| 2472                   | 3.09                        | 96.91                     |
| 1896                   | 2.37                        | 97.63                     |
| 1739                   | 2.17                        | 97.83                     |
| 1495                   | 1.87                        | 98.13                     |
| 1129                   | 1.41                        | 98.59                     |
| 894                    | 1.12                        | 98.88                     |
| 835                    | 1.04                        | 98.96                     |
| 806                    | 1.01                        | 98.99                     |
| 793                    | 0.99                        | 99.01                     |
| 792                    | 0.99                        | 99.01                     |
| 322                    | 0.40                        | 99.60                     |
| 318                    | 0.40                        | 99.60                     |
| 266                    | 0.33                        | 99.67                     |
| 264                    | 0.33                        | 99.67                     |
| 252                    | 0.31                        | 99.69                     |
| 163                    | 0.20                        | 99.80                     |
| 156                    | 0.19                        | 99.81                     |
| 674                    | 0.84                        | 99.16                     |
| 649                    | 0.81                        | 99.19                     |
| 571                    | 0.71                        | 99.29                     |
| 545                    | 0.68                        | 99.32                     |
| 468                    | 0.58                        | 99.42                     |
| 360                    | 0.45                        | 99.55                     |
| 353                    | 0.44                        | 99.56                     |
| 352                    | 0.44                        | 99.56                     |
| 346                    | 0.43                        | 99.57                     |
| 338                    | 0.42                        | 99.58                     |
| 302                    | 0.38                        | 99.62                     |
| 300                    | 0.37                        | 99.63                     |
| 261                    | 0.33                        | 99.67                     |
| 249                    | 0.31                        | 99.69                     |
| 248                    | 0.31                        | 99.69                     |
| 241                    | 0.30                        | 99.70                     |

|     |      |       |
|-----|------|-------|
| 214 | 0.27 | 99.73 |
| 192 | 0.24 | 99.76 |
| 187 | 0.23 | 99.77 |
| 181 | 0.23 | 99.77 |
| 179 | 0.22 | 99.78 |
| 176 | 0.22 | 99.78 |
| 174 | 0.22 | 99.78 |
| 171 | 0.21 | 99.79 |
| 169 | 0.21 | 99.79 |
| 159 | 0.20 | 99.80 |
| 156 | 0.19 | 99.81 |
| 153 | 0.19 | 99.81 |
| 142 | 0.18 | 99.82 |
| 140 | 0.17 | 99.83 |
| 135 | 0.17 | 99.83 |
| 131 | 0.16 | 99.84 |
| 125 | 0.16 | 99.84 |
| 121 | 0.15 | 99.85 |
| 112 | 0.14 | 99.86 |
| 102 | 0.13 | 99.87 |



**Supporting information (tables) to****Large-scale Modeling of Multi-Species Acute Toxicity Endpoints using Consensus of Multi-Task De**

Sankalp Jain, Vishal B. Siramshetty, Vinicius M. Alves, Eugene N. Muratov, Nicole Kleinstreuer, Ale

\*Corresponding author: Alexey V. Zakharov (Email: alexey.zakharov@nih.gov)

| MT-DNN                                     |               |               |               |               |               |
|--------------------------------------------|---------------|---------------|---------------|---------------|---------------|
| <b>Average Performance- Random Split</b>   |               |               |               |               |               |
| Metric                                     | Fold_0        | Fold_1        | Fold_2        | Fold_3        | Fold_4        |
| r2_score                                   | 0.51 +/- 0.18 | 0.50 +/- 0.18 | 0.52 +/- 0.16 | 0.52 +/- 0.13 | 0.51 +/- 0.16 |
| mae                                        | 0.52 +/- 0.16 | 0.51 +/- 0.14 | 0.48 +/- 0.13 | 0.49 +/- 0.13 | 0.50 +/- 0.14 |
| mse                                        | 0.56 +/- 0.34 | 0.55 +/- 0.28 | 0.47 +/- 0.26 | 0.48 +/- 0.24 | 0.49 +/- 0.25 |
| rmse                                       | 0.72 +/- 0.20 | 0.72 +/- 0.18 | 0.66 +/- 0.17 | 0.67 +/- 0.16 | 0.68 +/- 0.17 |
| <b>Average Performance- Scaffold Split</b> |               |               |               |               |               |
| Metric                                     | Fold_0        | Fold_1        | Fold_2        | Fold_3        | Fold_4        |
| r2_score                                   | 0.34 +/- 0.21 | 0.31 +/- 0.22 | 0.32 +/- 0.45 | 0.27 +/- 0.20 | 0.38 +/- 0.17 |
| mae                                        | 0.55 +/- 0.15 | 0.58 +/- 0.18 | 0.54 +/- 0.14 | 0.56 +/- 0.16 | 0.55 +/- 0.16 |
| mse                                        | 0.60 +/- 0.34 | 0.73 +/- 0.49 | 0.60 +/- 0.32 | 0.65 +/- 0.39 | 0.60 +/- 0.38 |
| rmse                                       | 0.75 +/- 0.20 | 0.82 +/- 0.26 | 0.75 +/- 0.19 | 0.77 +/- 0.21 | 0.75 +/- 0.21 |



## Deep Learning Methods

Alexander Tropsha, Marc C. Nicklaus, Anton Simeonov, Alexey V. Zakharov\*

|                      |
|----------------------|
|                      |
|                      |
| <b>5-CV (mean)</b>   |
| <b>0.51 +/- 0.16</b> |
| <b>0.50 +/- 0.14</b> |
| <b>0.51 +/- 0.23</b> |
| <b>0.69 +/- 0.18</b> |
|                      |
|                      |
| <b>5-CV (mean)</b>   |
| <b>0.32 +/- 0.25</b> |
| <b>0.56 +/- 0.16</b> |
| <b>0.64 +/- 0.38</b> |
| <b>0.77 +/- 0.21</b> |

| ST-RF                                      |               |               |               |
|--------------------------------------------|---------------|---------------|---------------|
| <b>Average Performance- Random Split</b>   |               |               |               |
|                                            |               |               |               |
| Metric                                     | Fold_0        | Fold_1        | Fold_2        |
| r2_score                                   | 0.34 +/- 0.20 | 0.31 +/- 0.19 | 0.38 +/- 0.17 |
| mae                                        | 0.61 +/- 0.19 | 0.62 +/- 0.20 | 0.57 +/- 0.18 |
| mse                                        | 0.76 +/- 0.41 | 0.79 +/- 0.46 | 0.61 +/- 0.36 |
| rmse                                       | 0.84 +/- 0.23 | 0.86 +/- 0.24 | 0.76 +/- 0.20 |
|                                            |               |               |               |
| <b>Average Performance- Scaffold Split</b> |               |               |               |
|                                            |               |               |               |
| Metric                                     | Fold_0        | Fold_1        | Fold_2        |
| r2_score                                   | 0.21 +/- 0.26 | 0.18 +/- 0.27 | 0.27 +/- 0.24 |
| mae                                        | 0.61 +/- 0.18 | 0.66 +/- 0.20 | 0.59 +/- 0.17 |
| mse                                        | 0.73 +/- 0.39 | 0.85 +/- 0.50 | 0.68 +/- 0.33 |
| rmse                                       | 0.82 +/- 0.22 | 0.89 +/- 0.26 | 0.80 +/- 0.20 |

| ST-DNN                                     |               |               |               |
|--------------------------------------------|---------------|---------------|---------------|
| <b>Average Performance- Random Split</b>   |               |               |               |
|                                            |               |               |               |
| Metric                                     | Fold_0        | Fold_1        | Fold_2        |
| r2_score                                   | 0.25 +/- 0.23 | 0.13 +/- 0.31 | 0.23 +/- 0.29 |
| mae                                        | 0.64 +/- 0.19 | 0.69 +/- 0.23 | 0.62 +/- 0.18 |
| mse                                        | 0.87 +/- 0.45 | 1.01 +/- 0.61 | 0.75 +/- 0.38 |
| rmse                                       | 0.9 +/- 0.24  | 0.96 +/- 0.29 | 0.84 +/- 0.22 |
|                                            |               |               |               |
| <b>Average Performance- Scaffold Split</b> |               |               |               |
|                                            |               |               |               |
| Metric                                     | Fold_0        | Fold_1        | Fold_2        |
| r2_score                                   | 0 +/- 0.5     | -0.01 +/- 0.4 | 0.14 +/- 0.34 |
| mae                                        | 0.68 +/- 0.2  | 0.73 +/- 0.25 | 0.65 +/- 0.2  |
| mse                                        | 0.89 +/- 0.47 | 1.05 +/- 0.64 | 0.81 +/- 0.42 |
| rmse                                       | 0.91 +/- 0.25 | 0.98 +/- 0.31 | 0.87 +/- 0.24 |

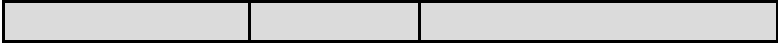

| Fold_3        | Fold_4        | 5-CV (mean)          |
|---------------|---------------|----------------------|
| 0.36 +/- 0.16 | 0.34 +/- 0.20 | <b>0.35 +/- 0.18</b> |
| 0.58 +/- 0.17 | 0.58 +/- 0.17 | <b>0.59 +/- 0.18</b> |
| 0.66 +/- 0.34 | 0.66 +/- 0.33 | <b>0.70 +/- 0.38</b> |
| 0.79 +/- 0.20 | 0.79 +/- 0.20 | <b>0.81 +/- 0.21</b> |
|               |               |                      |
|               |               |                      |
| Fold_3        | Fold_4        | 5-CV (mean)          |
| 0.19 +/- 0.26 | 0.23 +/- 0.22 | <b>0.22 +/- 0.25</b> |
| 0.61 +/- 0.19 | 0.63 +/- 0.17 | <b>0.62 +/- 0.18</b> |
| 0.83 +/- 0.22 | 0.74 +/- 0.37 | <b>0.74 +/- 0.40</b> |
| 0.81 +/- 0.22 | 0.83 +/- 0.21 | <b>0.83 +/- 0.22</b> |

| Average Performance- Random Split   |                      |
|-------------------------------------|----------------------|
| Metric                              | Fold_0               |
| r2_score                            | 0.50 +/- 0.18        |
| mae                                 | 0.53 +/- 0.17        |
| mse                                 | 0.58 +/- 0.37        |
| rmse                                | 0.73 +/- 0.21        |
| Average Performance- Scaffold Split |                      |
| Metric                              | Fold_0               |
| r2_score                            | 0.32 +/- 0.26        |
| mae                                 | 0.56 +/- 0.18        |
| mse                                 | 0.64 +/- 0.44        |
| rmse                                | <b>0.76 +/- 0.23</b> |

| Fold_3        | Fold_4        | 5-CV (mean)          |
|---------------|---------------|----------------------|
| 0.21 +/- 0.27 | 0.19 +/- 0.28 | <b>0.20 +/- 0.28</b> |
| 0.63 +/- 0.19 | 0.64 +/- 0.19 | <b>0.64 +/- 0.19</b> |
| 0.81 +/- 0.43 | 0.81 +/- 0.39 | <b>0.85 +/- 0.45</b> |
| 0.87 +/- 0.24 | 0.87 +/- 0.22 | <b>0.89 +/- 0.24</b> |
|               |               |                      |
|               |               |                      |
| Fold_3        | Fold_4        | 5-CV (mean)          |
| -0.01 +/- 0.3 | 0.11 +/- 0.31 | <b>0.05 +/- 0.39</b> |
| 0.67 +/- 0.2  | 0.66 +/- 0.19 | <b>0.68 +/- 0.21</b> |
| 0.87 +/- 0.46 | 0.84 +/- 0.48 | <b>0.89 +/- 0.49</b> |
| 0.9 +/- 0.24  | 0.89 +/- 0.24 | <b>0.91 +/- 0.26</b> |



**GCNN**

| <b>Fold_1</b>        | <b>Fold_2</b>        | <b>Fold_3</b>        | <b>Fold_4</b>        | <b>5-CV (mean)</b>   |
|----------------------|----------------------|----------------------|----------------------|----------------------|
| 0.48 +/- 0.18        | 0.50 +/- 0.18        | 0.53 +/- 0.13        | 0.49 +/- 0.16        | <b>0.50 +/- 0.17</b> |
| 0.53 +/- 0.16        | 0.49 +/- 0.17        | 0.49 +/- 0.13        | 0.51 +/- 0.16        | <b>0.51 +/- 0.16</b> |
| 0.58 +/- 0.33        | 0.49 +/- 0.33        | 0.48 +/- 0.24        | 0.52 +/- 0.31        | <b>0.53 +/- 0.32</b> |
| 0.74 +/- 0.19        | 0.67 +/- 0.19        | 0.67 +/- 0.16        | 0.70 +/- 0.18        | <b>0.70 +/- 0.19</b> |
|                      |                      |                      |                      |                      |
|                      |                      |                      |                      |                      |
|                      |                      |                      |                      |                      |
| <b>Fold_1</b>        | <b>Fold_2</b>        | <b>Fold_3</b>        | <b>Fold_4</b>        | <b>5-CV (mean)</b>   |
| 0.36 +/- 0.18        | 0.35 +/- 0.27        | 0.3 +/- 0.2          | 0.41 +/- 0.2         | 0.35 +/- 0.22        |
| 0.57 +/- 0.16        | 0.54 +/- 0.16        | 0.54 +/- 0.16        | 0.54 +/- 0.19        | 0.55 +/- 0.17        |
| 0.67 +/- 0.41        | 0.61 +/- 0.37        | 0.62 +/- 0.36        | 0.58 +/- 0.41        | 0.62 +/- 0.40        |
| <b>0.79 +/- 0.23</b> | <b>0.75 +/- 0.22</b> | <b>0.76 +/- 0.21</b> | <b>0.73 +/- 0.22</b> | <b>0.77 +/- 0.22</b> |





## DLCA

## Average Performance- Random Split

| Metric                              | Fold_0               | Fold_1               | Fold_2               | Fold_3               | Fold_4               |
|-------------------------------------|----------------------|----------------------|----------------------|----------------------|----------------------|
| r2_score                            | 0.54 +/- 0.16        | 0.51 +/- 0.17        | 0.55 +/- 0.16        | 0.55 +/- 0.12        | 0.54 +/- 0.14        |
| mae                                 | 0.5 +/- 0.16         | 0.51 +/- 0.15        | 0.46 +/- 0.15        | 0.48 +/- 0.13        | 0.47 +/- 0.14        |
| mse                                 | 0.52 +/- 0.31        | 0.55 +/- 0.3         | 0.44 +/- 0.29        | 0.47 +/- 0.25        | 0.46 +/- 0.26        |
| rmse                                | <b>0.7 +/- 0.19</b>  | <b>0.71 +/- 0.19</b> | <b>0.64 +/- 0.17</b> | <b>0.66 +/- 0.17</b> | <b>0.66 +/- 0.17</b> |
| Average Performance- Scaffold Split |                      |                      |                      |                      |                      |
| Metric                              | Fold_0               | Fold_1               | Fold_2               | Fold_3               | Fold_4               |
| r2_score                            | 0.34 +/- 0.21        | 0.37 +/- 0.21        | 0.39 +/- 0.22        | 0.32 +/- 0.15        | 0.40 +/- 0.15        |
| mae                                 | 0.55 +/- 0.17        | 0.55 +/- 0.18        | 0.52 +/- 0.14        | 0.54 +/- 0.16        | 0.54 +/- 0.16        |
| mse                                 | 0.62 +/- 0.37        | 0.66 +/- 0.43        | 0.57 +/- 0.31        | 0.61 +/- 0.38        | 0.59 +/- 0.34        |
| rmse                                | <b>0.75 +/- 0.22</b> | <b>0.78 +/- 0.24</b> | <b>0.73 +/- 0.2</b>  | <b>0.75 +/- 0.22</b> | <b>0.74 +/- 0.20</b> |



|                      |
|----------------------|
|                      |
|                      |
| <b>5-CV (mean)</b>   |
| 0.54 +/- 0.15        |
| 0.48 +/- 0.15        |
| 0.49 +/- 0.28        |
| <b>0.67 +/- 0.18</b> |
|                      |
|                      |
|                      |
| <b>5-CV (mean)</b>   |
| 0.36 +/- 0.18        |
| 0.54 +/- 0.16        |
| 0.61 +/- 0.36        |
| <b>0.75 +/- 0.21</b> |

| Consensus A                 |               |               |               |               |
|-----------------------------|---------------|---------------|---------------|---------------|
| Average Performance- Random |               |               |               |               |
| Metric                      | Fold_0        | Fold_1        | Fold_2        | Fold_3        |
| r2_score                    | 0.56 +/- 0.16 | 0.53 +/- 0.17 | 0.57 +/- 0.15 | 0.58 +/- 0.12 |
| mae                         | 0.49 +/- 0.16 | 0.49 +/- 0.15 | 0.46 +/- 0.15 | 0.46 +/- 0.12 |
| mse                         | 0.5 +/- 0.31  | 0.52 +/- 0.29 | 0.42 +/- 0.27 | 0.63 +/- 0.22 |
| rmse                        | 0.68 +/- 0.19 | 0.69 +/- 0.18 | 0.63 +/- 0.17 | 0.64 +/- 0.15 |

| Consensus B                 |               |               |               |               |
|-----------------------------|---------------|---------------|---------------|---------------|
| Average Performance- Random |               |               |               |               |
| Metric                      | Fold_0        | Fold_1        | Fold_2        | Fold_3        |
| r2_score                    | 0.57 +/- 0.16 | 0.54 +/- 0.17 | 0.58 +/- 0.14 | 0.58 +/- 0.11 |
| mae                         | 0.48 +/- 0.16 | 0.49 +/- 0.15 | 0.45 +/- 0.15 | 0.45 +/- 0.12 |
| mse                         | 0.49 +/- 0.3  | 0.51 +/- 0.28 | 0.41 +/- 0.27 | 0.42 +/- 0.22 |
| rmse                        | 0.68 +/- 0.19 | 0.69 +/- 0.18 | 0.62 +/- 0.17 | 0.63 +/- 0.16 |



| Fold_4        | 5-CV (mean)          |
|---------------|----------------------|
| 0.56 +/- 0.14 | <b>0.56 +/- 0.15</b> |
| 0.47 +/- 0.14 | <b>0.47 +/- 0.14</b> |
| 0.44 +/- 0.25 | <b>0.50 +/- 0.27</b> |
| 0.64 +/- 0.17 | <b>0.66 +/- 0.17</b> |

| Fold_4        | 5-CV (mean)          |
|---------------|----------------------|
| 0.57 +/- 0.13 | 0.57 +/- 0.14        |
| 0.46 +/- 0.14 | 0.46 +/- 0.14        |
| 0.43 +/- 0.24 | 0.45 +/- 0.26        |
| 0.63 +/- 0.16 | <b>0.65 +/- 0.17</b> |

|             |
|-------------|
| MT-DNN      |
| ST-RF       |
| ST-DNN      |
| GCNN        |
| DLCA        |
| Consensus A |
| Consensus B |



|                                |
|--------------------------------|
| Multi-task DNN                 |
| Single Task - Random Forests   |
| Single Task - DNN              |
| Multi-task GCNN                |
| Multi-task DLCA                |
| Consensus-MT-DNN + GCNN        |
| Consensus-MT-DNN + GCNN + DLCA |































**Large-scale Modeling of Multi-Species Acute Toxicity Endpoints using Consensus of Multi-Task I**  
 Sankalp Jain, Vishal B. Siramshetty, Vinicius M. Alves, Eugene N. Muratov, Nicole Kleinstreuer, A  
 \*Corresponding author: Alexey V. Zakharov (Email: alexey.zakharov@nih.gov)

| ML-Method  | RMSE | R2   |
|------------|------|------|
| MT-DNN     | 0.69 | 0.51 |
| ST-RF      | 0.81 | 0.35 |
| ST-DNN     | 0.89 | 0.2  |
| GCNN       | 0.7  | 0.5  |
| DLCA       | 0.67 | 0.54 |
| Cosensus A | 0.66 | 0.56 |
| Cosensus B | 0.65 | 0.57 |

**Wilcoxon-test**

|                                               | MT-DNN  | ST-RF   | MT-DNN | DLCA    |
|-----------------------------------------------|---------|---------|--------|---------|
|                                               | vs.     | vs.     | vs.    | vs.     |
|                                               | ST-RF   | ST-DNN  | GCNN   | MT-DNN  |
| <b>P value (RMSE)</b>                         | <0.0001 | <0.0001 | 0.1331 | <0.0001 |
| <b>P value (R2)</b>                           | <0.0001 | <0.0001 | 0.081  | <0.0001 |
| <b>Significantly different (P &lt; 0.05)?</b> | Yes     | Yes     | No     | Yes     |

## Deep Learning Methods

Alexander Tropsha, Marc C. Nicklaus, Anton Simeonov, Alexey V. Zakharov\*

| DLCA    | Consensus A | Consensus B | Consensus B |
|---------|-------------|-------------|-------------|
| vs.     | vs.         | vs.         | vs.         |
| GCNN    | DLCA        | DLCA        | Consensus A |
| <0.0001 | 0.0027      | <0.0001     | <0.0001     |
| <0.0001 | 0.0064      | <0.0001     | <0.0001     |
| Yes     | Yes         | Yes         | Yes         |







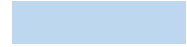

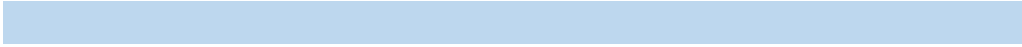

MT-DNN | Multi-task DNN

## Supporting information (tables) to

### Large-scale Modeling of Multi-Species Acute Toxicity Endpoints using Consensus of Multi-Task Deep Learning

Sankalp Jain, Vishal B. Siramshetty, Vinicius M. Alves, Eugene N. Muratov, Nicole Kleinstreuer, Alexanc

\*Corresponding author: Alexey V. Zakharov (Email: alexey.zakharov@nih.gov)

| Task                                           | MT-DNN |                | ST-DNN |                |
|------------------------------------------------|--------|----------------|--------|----------------|
|                                                | RMSE   | R <sup>2</sup> | RMSE   | R <sup>2</sup> |
| mouse_intravenous_LDLo                         | 0.83   | 0.53           | 1.14   | 0.10           |
| frog_subcutaneous_LDLo                         | 0.84   | 0.54           | 0.98   | 0.37           |
| guinea pig_intravenous_LDLo                    | 0.65   | 0.61           | 0.98   | 0.06           |
| mammal (species unspecified)_subcutaneous_LD50 | 0.47   | 0.20           | 0.58   | -0.24          |
| rabbit_intraperitoneal_LD50                    | 0.66   | 0.43           | 1.00   | -0.28          |
| rat_intravenous_LDLo                           | 0.80   | 0.48           | 1.20   | -0.15          |
| cat_oral_LDLo                                  | 0.69   | 0.41           | 0.94   | -0.04          |
| human_oral_TDLo                                | 1.27   | 0.32           | 1.55   | -0.02          |
| guinea pig_intravenous_LD50                    | 0.75   | 0.62           | 1.23   | 0.00           |
| rabbit_subcutaneous_LD50                       | 0.81   | 0.62           | 1.11   | 0.28           |
| women_oral_TDLo                                | 1.04   | 0.20           | 1.14   | 0.04           |
| cat_intravenous_LDLo                           | 0.68   | 0.71           | 1.04   | 0.32           |
| man_oral_TDLo                                  | 1.11   | 0.17           | 1.31   | -0.14          |
| guinea pig_subcutaneous_LD50                   | 0.81   | 0.58           | 1.07   | 0.27           |
| cat_oral_LD50                                  | 0.83   | 0.47           | 1.10   | 0.08           |
| rat_subcutaneous_LDLo                          | 0.66   | 0.68           | 0.98   | 0.30           |
| guinea pig_skin_LD50                           | 0.77   | 0.33           | 0.92   | 0.06           |
| guinea pig_subcutaneous_LDLo                   | 0.75   | 0.65           | 0.98   | 0.40           |
| rabbit_skin_LDLo                               | 0.67   | 0.47           | 0.91   | 0.02           |
| dog_oral_LDLo                                  | 0.83   | 0.52           | 1.23   | -0.08          |
| duck_oral_LD50                                 | 0.92   | 0.48           | 1.09   | 0.26           |
| mouse_skin_LD50                                | 0.79   | 0.36           | 0.99   | 0.02           |
| rabbit_subcutaneous_LDLo                       | 0.66   | 0.73           | 0.84   | 0.56           |
| guinea pig_intraperitoneal_LD50                | 0.61   | 0.57           | 0.94   | -0.02          |
| rabbit_oral_LDLo                               | 0.58   | 0.57           | 0.76   | 0.28           |
| mouse_subcutaneous_LDLo                        | 0.76   | 0.31           | 0.97   | -0.12          |
| cat_intravenous_LD50                           | 0.80   | 0.63           | 1.10   | 0.31           |
| mouse_oral_LDLo                                | 0.68   | 0.34           | 0.91   | -0.16          |
| mouse_intraperitoneal_LDLo                     | 0.67   | 0.46           | 0.94   | -0.06          |
| rat_intramuscular_LD50                         | 0.70   | 0.57           | 1.00   | 0.15           |
| mouse_parenteral_LD50                          | 0.71   | 0.46           | 0.84   | 0.21           |
| rat_intraperitoneal_LDLo                       | 0.58   | 0.53           | 0.84   | 0.00           |
| rat_oral_LDLo                                  | 0.68   | 0.37           | 0.87   | -0.06          |
| bird - wild_oral_LD50                          | 0.72   | 0.38           | 0.90   | 0.04           |
| rabbit_intravenous_LDLo                        | 0.74   | 0.61           | 1.00   | 0.27           |
| quail_oral_LD50                                | 0.74   | 0.46           | 0.89   | 0.22           |
| chicken_oral_LD50                              | 0.84   | 0.36           | 1.04   | 0.01           |

|                                                   |      |      |      |      |
|---------------------------------------------------|------|------|------|------|
| dog_intravenous_LDLo                              | 0.71 | 0.62 | 1.00 | 0.26 |
| dog_intravenous_LD50                              | 0.66 | 0.64 | 0.91 | 0.32 |
| mammal (species unspecified)_intraperitoneal_LD50 | 0.40 | 0.64 | 0.55 | 0.29 |
| mouse_intramuscular_LD50                          | 0.58 | 0.58 | 0.78 | 0.25 |
| dog_oral_LD50                                     | 0.77 | 0.38 | 0.93 | 0.10 |
| mammal (species unspecified)_oral_LD50            | 0.49 | 0.63 | 0.68 | 0.30 |
| guinea pig_oral_LD50                              | 0.72 | 0.61 | 0.80 | 0.52 |
| rabbit_intravenous_LD50                           | 0.63 | 0.72 | 0.85 | 0.49 |
| rat_unreported_LD50                               | 0.64 | 0.56 | 0.79 | 0.31 |
| rat_skin_LD50                                     | 0.66 | 0.36 | 0.77 | 0.13 |
| rabbit_oral_LD50                                  | 0.62 | 0.56 | 0.74 | 0.37 |
| mammal (species unspecified)_unreported_LD50      | 0.44 | 0.50 | 0.50 | 0.35 |
| rabbit_skin_LD50                                  | 0.56 | 0.43 | 0.63 | 0.27 |
| mouse_unreported_LD50                             | 0.50 | 0.68 | 0.60 | 0.54 |
| rat_subcutaneous_LD50                             | 0.68 | 0.53 | 0.77 | 0.40 |
| rat_intravenous_LD50                              | 0.56 | 0.67 | 0.65 | 0.56 |
| rat_intraperitoneal_LD50                          | 0.56 | 0.56 | 0.62 | 0.46 |
| mouse_subcutaneous_LD50                           | 0.55 | 0.59 | 0.59 | 0.54 |
| rat_oral_LD50                                     | 0.57 | 0.60 | 0.58 | 0.58 |
| mouse_intravenous_LD50                            | 0.48 | 0.57 | 0.48 | 0.57 |
| mouse_oral_LD50                                   | 0.42 | 0.51 | 0.43 | 0.49 |
| mouse_intraperitoneal_LD50                        | 0.45 | 0.59 | 0.45 | 0.58 |

Learning Methods

ler Tropsha, Marc C. Nicklaus, Anton Simeonov, Alexey V. Zakharov\*

| random_split |                |      |                |      |                |             |                |
|--------------|----------------|------|----------------|------|----------------|-------------|----------------|
| ST-RF        |                | GCNN |                | DLCA |                | Consensus A |                |
| RMSE         | R <sup>2</sup> | RMSE | R <sup>2</sup> | RMSE | R <sup>2</sup> | RMSE        | R <sup>2</sup> |
| 1.05         | 0.25           | 0.86 | 0.49           | 0.79 | 0.58           | 0.80        | 0.56           |
| 0.97         | 0.38           | 0.82 | 0.56           | 0.84 | 0.54           | 0.80        | 0.58           |
| 0.74         | 0.49           | 0.67 | 0.57           | 0.61 | 0.66           | 0.64        | 0.62           |
| 0.43         | 0.33           | 0.45 | 0.28           | 0.48 | 0.18           | 0.42        | 0.36           |
| 0.85         | 0.08           | 0.62 | 0.51           | 0.63 | 0.48           | 0.61        | 0.51           |
| 1.00         | 0.21           | 0.88 | 0.37           | 0.76 | 0.55           | 0.79        | 0.50           |
| 0.88         | 0.08           | 0.70 | 0.39           | 0.64 | 0.51           | 0.67        | 0.45           |
| 1.46         | 0.11           | 1.44 | 0.11           | 1.32 | 0.27           | 1.29        | 0.31           |
| 0.89         | 0.47           | 0.77 | 0.60           | 0.71 | 0.66           | 0.71        | 0.66           |
| 1.07         | 0.36           | 0.83 | 0.59           | 0.86 | 0.56           | 0.76        | 0.66           |
| 1.06         | 0.17           | 1.05 | 0.19           | 1.09 | 0.13           | 1.01        | 0.26           |
| 0.86         | 0.54           | 0.74 | 0.66           | 0.66 | 0.72           | 0.67        | 0.72           |
| 1.21         | 0.02           | 1.13 | 0.15           | 1.04 | 0.28           | 1.06        | 0.26           |
| 1.10         | 0.21           | 0.88 | 0.48           | 0.83 | 0.56           | 0.80        | 0.58           |
| 0.90         | 0.38           | 0.84 | 0.46           | 0.76 | 0.56           | 0.79        | 0.52           |
| 0.93         | 0.36           | 0.69 | 0.65           | 0.66 | 0.68           | 0.67        | 0.67           |
| 0.76         | 0.38           | 0.78 | 0.32           | 0.74 | 0.40           | 0.75        | 0.37           |
| 0.88         | 0.52           | 0.72 | 0.68           | 0.75 | 0.65           | 0.70        | 0.70           |
| 0.89         | 0.09           | 0.77 | 0.31           | 0.70 | 0.45           | 0.68        | 0.46           |
| 1.11         | 0.14           | 0.88 | 0.46           | 0.84 | 0.51           | 0.84        | 0.51           |
| 0.99         | 0.39           | 0.94 | 0.44           | 0.85 | 0.55           | 0.88        | 0.52           |
| 0.89         | 0.21           | 0.71 | 0.49           | 0.79 | 0.38           | 0.73        | 0.46           |
| 0.85         | 0.55           | 0.61 | 0.76           | 0.61 | 0.77           | 0.59        | 0.78           |
| 0.79         | 0.28           | 0.66 | 0.49           | 0.62 | 0.56           | 0.63        | 0.55           |
| 0.72         | 0.36           | 0.63 | 0.49           | 0.61 | 0.53           | 0.59        | 0.55           |
| 0.90         | 0.03           | 0.73 | 0.36           | 0.77 | 0.30           | 0.73        | 0.38           |
| 0.88         | 0.55           | 0.78 | 0.65           | 0.78 | 0.65           | 0.76        | 0.67           |
| 0.77         | 0.16           | 0.68 | 0.36           | 0.68 | 0.35           | 0.66        | 0.39           |
| 0.83         | 0.17           | 0.65 | 0.49           | 0.62 | 0.53           | 0.62        | 0.53           |
| 0.93         | 0.25           | 0.67 | 0.61           | 0.70 | 0.58           | 0.65        | 0.63           |
| 0.76         | 0.39           | 0.72 | 0.44           | 0.72 | 0.44           | 0.66        | 0.53           |
| 0.77         | 0.18           | 0.55 | 0.58           | 0.56 | 0.57           | 0.54        | 0.58           |
| 0.78         | 0.15           | 0.69 | 0.33           | 0.64 | 0.44           | 0.64        | 0.42           |
| 0.75         | 0.33           | 0.71 | 0.41           | 0.67 | 0.46           | 0.68        | 0.45           |
| 0.92         | 0.39           | 0.75 | 0.59           | 0.71 | 0.63           | 0.71        | 0.64           |
| 0.81         | 0.35           | 0.75 | 0.44           | 0.71 | 0.51           | 0.72        | 0.49           |
| 0.90         | 0.27           | 0.87 | 0.31           | 0.77 | 0.45           | 0.81        | 0.41           |

|      |      |      |      |      |      |      |      |
|------|------|------|------|------|------|------|------|
| 0.93 | 0.36 | 0.72 | 0.61 | 0.70 | 0.64 | 0.68 | 0.66 |
| 0.81 | 0.45 | 0.64 | 0.67 | 0.64 | 0.66 | 0.62 | 0.69 |
| 0.48 | 0.48 | 0.45 | 0.54 | 0.43 | 0.59 | 0.40 | 0.63 |
| 0.71 | 0.39 | 0.57 | 0.61 | 0.55 | 0.63 | 0.54 | 0.64 |
| 0.87 | 0.22 | 0.76 | 0.39 | 0.73 | 0.44 | 0.73 | 0.44 |
| 0.60 | 0.44 | 0.54 | 0.54 | 0.53 | 0.57 | 0.48 | 0.63 |
| 0.77 | 0.55 | 0.70 | 0.63 | 0.69 | 0.64 | 0.66 | 0.67 |
| 0.79 | 0.55 | 0.64 | 0.71 | 0.62 | 0.72 | 0.61 | 0.74 |
| 0.73 | 0.41 | 0.62 | 0.57 | 0.60 | 0.60 | 0.59 | 0.61 |
| 0.71 | 0.25 | 0.63 | 0.41 | 0.62 | 0.43 | 0.62 | 0.44 |
| 0.70 | 0.43 | 0.61 | 0.56 | 0.60 | 0.57 | 0.60 | 0.59 |
| 0.47 | 0.41 | 0.46 | 0.45 | 0.44 | 0.49 | 0.42 | 0.53 |
| 0.63 | 0.28 | 0.55 | 0.44 | 0.54 | 0.47 | 0.53 | 0.48 |
| 0.56 | 0.59 | 0.54 | 0.63 | 0.48 | 0.70 | 0.48 | 0.71 |
| 0.75 | 0.43 | 0.68 | 0.53 | 0.65 | 0.58 | 0.64 | 0.58 |
| 0.64 | 0.57 | 0.57 | 0.65 | 0.54 | 0.69 | 0.54 | 0.70 |
| 0.62 | 0.47 | 0.56 | 0.56 | 0.55 | 0.59 | 0.54 | 0.60 |
| 0.58 | 0.54 | 0.56 | 0.58 | 0.53 | 0.62 | 0.52 | 0.63 |
| 0.58 | 0.58 | 0.56 | 0.61 | 0.53 | 0.64 | 0.53 | 0.65 |
| 0.48 | 0.56 | 0.47 | 0.58 | 0.44 | 0.64 | 0.44 | 0.63 |
| 0.43 | 0.50 | 0.43 | 0.50 | 0.40 | 0.55 | 0.40 | 0.56 |
| 0.45 | 0.58 | 0.45 | 0.57 | 0.42 | 0.63 | 0.42 | 0.63 |

|             |      | scaffold_9 |       |        |       |      |  |
|-------------|------|------------|-------|--------|-------|------|--|
| Consensus B |      | MT-DNN     |       | ST-DNN |       | ST-  |  |
| RMSE        | R^2  | RMSE       | R^2   |        |       | RMSE |  |
| 0.78        | 0.58 | 0.82       | 0.46  | 1.22   | -0.32 | 1.13 |  |
| 0.80        | 0.58 | 1.06       | 0.20  | 1.15   | -0.13 | 0.93 |  |
| 0.61        | 0.66 | 0.58       | 0.61  | 0.82   | 0.14  | 0.58 |  |
| 0.44        | 0.32 | 0.55       | -0.63 | 0.59   | -0.57 | 0.52 |  |
| 0.60        | 0.53 | 0.70       | 0.32  | 0.98   | -0.32 | 0.88 |  |
| 0.78        | 0.52 | 1.04       | 0.13  | 1.35   | -0.47 | 1.15 |  |
| 0.64        | 0.50 | 0.71       | 0.40  | 1.02   | -0.21 | 0.87 |  |
| 1.29        | 0.30 | 1.37       | 0.16  | 1.49   | -0.01 | 1.38 |  |
| 0.70        | 0.67 | 0.89       | 0.46  | 1.19   | 0.05  | 0.83 |  |
| 0.78        | 0.65 | 0.81       | 0.42  | 0.92   | 0.26  | 0.96 |  |
| 1.01        | 0.26 | 1.17       | -0.03 | 1.18   | -0.10 | 1.14 |  |
| 0.65        | 0.73 | 0.73       | 0.54  | 1.08   | -0.02 | 0.77 |  |
| 1.04        | 0.28 | 1.10       | 0.00  | 1.35   | -0.48 | 1.21 |  |
| 0.79        | 0.59 | 0.74       | 0.38  | 1.00   | -0.14 | 1.01 |  |
| 0.76        | 0.56 | 0.85       | 0.56  | 0.96   | 0.46  | 0.87 |  |
| 0.63        | 0.71 | 0.84       | 0.44  | 1.14   | -0.03 | 1.08 |  |
| 0.72        | 0.42 | 1.01       | -0.11 | 1.00   | -0.08 | 0.86 |  |
| 0.70        | 0.69 | 1.02       | 0.24  | 0.98   | 0.27  | 0.93 |  |
| 0.68        | 0.46 | 0.60       | 0.12  | 0.87   | -0.91 | 0.73 |  |
| 0.82        | 0.54 | 1.05       | 0.14  | 1.30   | -0.36 | 1.19 |  |
| 0.86        | 0.54 | 0.96       | 0.39  | 1.02   | 0.31  | 1.00 |  |
| 0.73        | 0.47 | 0.67       | 0.27  | 0.78   | -0.01 | 0.82 |  |
| 0.57        | 0.79 | 0.91       | 0.36  | 0.90   | 0.33  | 0.80 |  |
| 0.60        | 0.58 | 0.65       | 0.40  | 0.85   | -0.06 | 0.73 |  |
| 0.58        | 0.58 | 0.65       | 0.49  | 0.73   | 0.36  | 0.77 |  |
| 0.72        | 0.38 | 0.71       | 0.40  | 0.95   | -0.08 | 0.88 |  |
| 0.75        | 0.67 | 0.80       | 0.61  | 1.04   | 0.33  | 0.92 |  |
| 0.65        | 0.40 | 0.70       | 0.25  | 0.98   | -0.50 | 0.80 |  |
| 0.61        | 0.55 | 0.71       | 0.33  | 0.92   | -0.14 | 0.86 |  |
| 0.65        | 0.64 | 0.71       | 0.34  | 0.87   | 0.00  | 0.81 |  |
| 0.67        | 0.52 | 0.80       | 0.44  | 1.00   | 0.09  | 0.89 |  |
| 0.52        | 0.62 | 0.68       | 0.39  | 0.88   | -0.04 | 0.82 |  |
| 0.63        | 0.44 | 0.71       | 0.32  | 0.97   | -0.28 | 0.86 |  |
| 0.67        | 0.47 | 0.89       | 0.20  | 1.11   | -0.26 | 0.95 |  |
| 0.69        | 0.66 | 0.88       | 0.34  | 1.04   | 0.09  | 0.96 |  |
| 0.70        | 0.52 | 0.72       | 0.38  | 0.86   | 0.11  | 0.75 |  |
| 0.79        | 0.43 | 0.81       | 0.37  | 0.98   | 0.08  | 0.92 |  |



|      |      |      |      |      |      |      |
|------|------|------|------|------|------|------|
| 0.67 | 0.67 | 0.88 | 0.45 | 1.14 | 0.06 | 1.01 |
| 0.60 | 0.70 | 0.75 | 0.48 | 0.88 | 0.28 | 0.80 |
| 0.40 | 0.64 | 0.48 | 0.41 | 0.58 | 0.13 | 0.50 |
| 0.53 | 0.66 | 0.66 | 0.39 | 0.80 | 0.11 | 0.77 |
| 0.71 | 0.47 | 0.85 | 0.25 | 0.98 | 0.00 | 0.92 |
| 0.48 | 0.64 | 0.72 | 0.19 | 0.77 | 0.06 | 0.70 |
| 0.66 | 0.67 | 1.01 | 0.37 | 1.05 | 0.32 | 1.04 |
| 0.59 | 0.75 | 0.77 | 0.50 | 0.82 | 0.44 | 0.78 |
| 0.58 | 0.62 | 0.67 | 0.36 | 0.76 | 0.18 | 0.70 |
| 0.61 | 0.46 | 0.64 | 0.13 | 0.65 | 0.09 | 0.65 |
| 0.58 | 0.61 | 0.72 | 0.31 | 0.80 | 0.13 | 0.75 |
| 0.42 | 0.54 | 0.47 | 0.30 | 0.49 | 0.22 | 0.49 |
| 0.53 | 0.50 | 0.59 | 0.26 | 0.66 | 0.08 | 0.63 |
| 0.47 | 0.72 | 0.59 | 0.57 | 0.67 | 0.43 | 0.63 |
| 0.63 | 0.60 | 0.76 | 0.38 | 0.86 | 0.21 | 0.83 |
| 0.52 | 0.71 | 0.65 | 0.49 | 0.70 | 0.41 | 0.70 |
| 0.52 | 0.62 | 0.64 | 0.36 | 0.68 | 0.28 | 0.66 |
| 0.51 | 0.65 | 0.65 | 0.38 | 0.66 | 0.35 | 0.67 |
| 0.52 | 0.66 | 0.68 | 0.40 | 0.70 | 0.36 | 0.70 |
| 0.43 | 0.65 | 0.54 | 0.42 | 0.53 | 0.43 | 0.53 |
| 0.39 | 0.58 | 0.48 | 0.30 | 0.48 | 0.29 | 0.47 |
| 0.41 | 0.65 | 0.52 | 0.43 | 0.52 | 0.42 | 0.52 |

| split |      |       |      |       |
|-------|------|-------|------|-------|
| RF    | GCNN |       | DLCA |       |
| R^2   | RMSE | R^2   | RMSE | R^2   |
| -0.04 | 0.91 | 0.34  | 0.81 | 0.47  |
| 0.36  | 0.97 | 0.34  | 0.98 | 0.33  |
| 0.61  | 0.58 | 0.54  | 0.57 | 0.63  |
| -0.19 | 0.43 | 0.02  | 0.47 | 0.00  |
| -0.05 | 0.66 | 0.40  | 0.72 | 0.29  |
| -0.05 | 1.01 | 0.17  | 0.99 | 0.21  |
| 0.12  | 0.81 | 0.22  | 0.69 | 0.43  |
| 0.14  | 1.54 | -0.08 | 1.39 | 0.13  |
| 0.52  | 0.77 | 0.59  | 0.81 | 0.56  |
| 0.23  | 0.86 | 0.34  | 0.88 | 0.33  |
| 0.01  | 1.04 | 0.19  | 1.11 | 0.08  |
| 0.48  | 0.77 | 0.50  | 0.73 | 0.53  |
| -0.18 | 1.11 | -0.03 | 1.03 | 0.14  |
| -0.14 | 0.79 | 0.28  | 0.77 | 0.34  |
| 0.55  | 0.85 | 0.58  | 0.88 | 0.53  |
| 0.09  | 0.75 | 0.56  | 0.87 | 0.41  |
| 0.20  | 0.94 | 0.09  | 0.99 | -0.05 |
| 0.35  | 0.92 | 0.37  | 0.94 | 0.32  |
| -0.19 | 0.68 | -0.07 | 0.62 | 0.05  |
| -0.11 | 1.10 | 0.08  | 1.03 | 0.19  |
| 0.34  | 1.00 | 0.35  | 0.98 | 0.37  |
| -0.13 | 0.63 | 0.34  | 0.64 | 0.34  |
| 0.47  | 0.87 | 0.40  | 0.93 | 0.31  |
| 0.23  | 0.57 | 0.56  | 0.63 | 0.43  |
| 0.30  | 0.71 | 0.41  | 0.70 | 0.42  |
| 0.07  | 0.73 | 0.37  | 0.77 | 0.29  |
| 0.48  | 0.82 | 0.60  | 0.84 | 0.57  |
| 0.03  | 0.70 | 0.27  | 0.71 | 0.25  |
| 0.02  | 0.73 | 0.29  | 0.67 | 0.41  |
| 0.13  | 0.76 | 0.22  | 0.73 | 0.31  |
| 0.29  | 0.82 | 0.39  | 0.85 | 0.37  |
| 0.11  | 0.64 | 0.44  | 0.67 | 0.40  |
| 0.02  | 0.82 | 0.09  | 0.74 | 0.27  |
| 0.11  | 0.84 | 0.29  | 0.77 | 0.40  |
| 0.23  | 0.82 | 0.41  | 0.86 | 0.37  |
| 0.32  | 0.73 | 0.35  | 0.68 | 0.44  |
| 0.19  | 0.85 | 0.32  | 0.77 | 0.43  |

|             |
|-------------|
| MT-DNN      |
| ST-DNN      |
| ST-RF       |
| GCNN        |
| DLCA        |
| Consensus A |
| Consensus B |

|      |      |      |      |      |
|------|------|------|------|------|
| 0.26 | 0.84 | 0.49 | 0.88 | 0.45 |
| 0.41 | 0.70 | 0.55 | 0.71 | 0.54 |
| 0.35 | 0.45 | 0.46 | 0.46 | 0.45 |
| 0.17 | 0.68 | 0.35 | 0.66 | 0.40 |
| 0.13 | 0.82 | 0.29 | 0.84 | 0.26 |
| 0.23 | 0.65 | 0.32 | 0.72 | 0.19 |
| 0.33 | 0.90 | 0.49 | 0.99 | 0.40 |
| 0.50 | 0.70 | 0.59 | 0.74 | 0.55 |
| 0.31 | 0.65 | 0.41 | 0.63 | 0.44 |
| 0.10 | 0.62 | 0.18 | 0.56 | 0.32 |
| 0.24 | 0.72 | 0.30 | 0.69 | 0.36 |
| 0.22 | 0.46 | 0.32 | 0.45 | 0.37 |
| 0.15 | 0.59 | 0.26 | 0.56 | 0.32 |
| 0.50 | 0.56 | 0.60 | 0.55 | 0.62 |
| 0.25 | 0.77 | 0.36 | 0.74 | 0.41 |
| 0.40 | 0.63 | 0.52 | 0.61 | 0.54 |
| 0.31 | 0.62 | 0.40 | 0.61 | 0.43 |
| 0.35 | 0.64 | 0.40 | 0.62 | 0.44 |
| 0.38 | 0.67 | 0.41 | 0.66 | 0.43 |
| 0.43 | 0.51 | 0.48 | 0.49 | 0.52 |
| 0.32 | 0.48 | 0.31 | 0.46 | 0.36 |
| 0.42 | 0.49 | 0.49 | 0.49 | 0.50 |

|                                      |
|--------------------------------------|
| Multi-task DNN                       |
| Single Task - DNN                    |
| Single Task - Random Forests         |
| Multi-task GCNN                      |
| Multi-task DLCA                      |
| Consensus-MT-DNN v2 + GCNN v2        |
| Consensus-MT-DNN v2 + GCNN v2 + DLCA |



## Supporting information (tables) to

### Large-scale Modeling of Multi-Species Acute Toxicity Endpoints using Consensus of Multi-Task Deep

Sankalp Jain, Vishal B. Siramshetty, Vinicius M. Alves, Eugene N. Muratov, Nicole Kleinstreuer, Alexa

\*Corresponding author: Alexey V. Zakharov (Email: alexey.zakharov@nih.gov)

| Task                                         | Sosnin et al. [49] |                | MT-D        |
|----------------------------------------------|--------------------|----------------|-------------|
|                                              | RMSE               | R <sup>2</sup> | RMSE        |
| mouse_intraperitoneal_LD50                   | 0.41               | 0.65           | 0.45        |
| mouse_oral_LD50                              | 0.42               | 0.54           | 0.42        |
| mouse_intravenous_LD50                       | 0.43               | 0.66           | 0.48        |
| rat_oral_LD50                                | 0.53               | 0.65           | 0.57        |
| mouse_subcutaneous_LD50                      | 0.51               | 0.65           | 0.55        |
| rat_intraperitoneal_LD50                     | 0.55               | 0.62           | 0.56        |
| rat_intravenous_LD50                         | 0.54               | 0.71           | 0.56        |
| rat_subcutaneous_LD50                        | 0.64               | 0.61           | 0.68        |
| mouse_unreported_LD50                        | 0.51               | 0.69           | 0.50        |
| rabbit_skin_LD50                             | 0.56               | 0.44           | 0.56        |
| mammal (species unspecified)_unreported_LD50 | 0.40               | 0.59           | 0.44        |
| rabbit_oral_LD50                             | 0.58               | 0.58           | 0.62        |
| rat_skin_LD50                                | 0.63               | 0.36           | 0.66        |
| rat_unreported_LD50                          | 0.60               | 0.46           | 0.64        |
| rabbit_intravenous_LD50                      | 0.68               | 0.69           | 0.63        |
| guinea pig_oral_LD50                         | 0.70               | 0.64           | 0.72        |
| rat_oral_LDLo                                | 0.61               | 0.56           | 0.68        |
| rat_intraperitoneal_LDLo                     | 0.43               | 0.61           | 0.58        |
| <b>Average for 18 tasks</b>                  | <b>0.54</b>        | <b>0.60</b>    | <b>0.57</b> |
